# Supplementary material for: Discriminant Analysis of the Geographical Origin of Asian Red Pepper Powders Using Second-Derivative FT-IR Spectroscopy
Source: MDPI journal article supplement (doi:10.3390/foods10051034), 2021-05-10
Supplement: s1 [file s1]

Supplementary Materials

# Discriminant Analysis of the Geographical Origin of Asian Red Pepper Powders Using Second-Derivative FT-IR Spectroscopy

Miso Kim <sup>1,†</sup>, Junyoung Hong <sup>1,†</sup>, Dongwon Lee <sup>1</sup>, Sohyun Kim <sup>1</sup>, Hyang Sook Chun <sup>2</sup>, Yoon-Ho Cho <sup>3</sup>, Byung Hee Kim <sup>4</sup> and Sangdoo Ahn <sup>1,\*</sup>

<sup>1</sup> Department of Chemistry, Chung-Ang University, Seoul 06974, Republic of Korea; rlaalth1328@naver.com (M.K.), hjuny94@hanmail.net (J.H.), idleplanet@naver.com (D.L.); dragon725@naver.com (S.K.), sangdoo@cau.ac.kr (S.A.)

<sup>2</sup> Department of Food Science & Technology, Chung-Ang University, Ansong 17546, Republic of Korea; hschun@cau.ac.kr (H.S.C.)

<sup>3</sup> Department of Civil and Environmental Engineering, Chung-Ang University, Seoul, 06974, Republic of Korea; yhcho@cau.ac.kr (Y.H.C.)

<sup>4</sup> Department of Food and Nutrition, Sookmyung Women's University, Seoul 04310, Republic of Korea; bhkim@sookmyung.ac.kr (B.H.K.)

\* Correspondence: sangdoo@cau.ac.kr (S.A.); Tel.: +82-2-820-5230 (S.A.)

† These authors contributed equally to this work.

**Keywords:** Fourier-transform infrared (FT-IR) spectroscopy; second-derivative spectrum; red pepper powder; geographical origin; discriminant analysis

**Supplementary Materials:** The following are available online at [www.mdpi.com/2304-8158/10/5/1034/s1](http://www.mdpi.com/2304-8158/10/5/1034/s1), Figure S1: Expanded (fructose hydrogen regions, normalized to the integral sum of all signals) <sup>1</sup>H NMR spectra of Asian red pepper powders at 600MHz NMR, Table S1: Test of homogeneity of variance between the groups of Korean, Chinese, and Vietnamese red pepper powders using second derivative values of FT-IR spectra, Table S2: Pearson's Correlation Matrix.

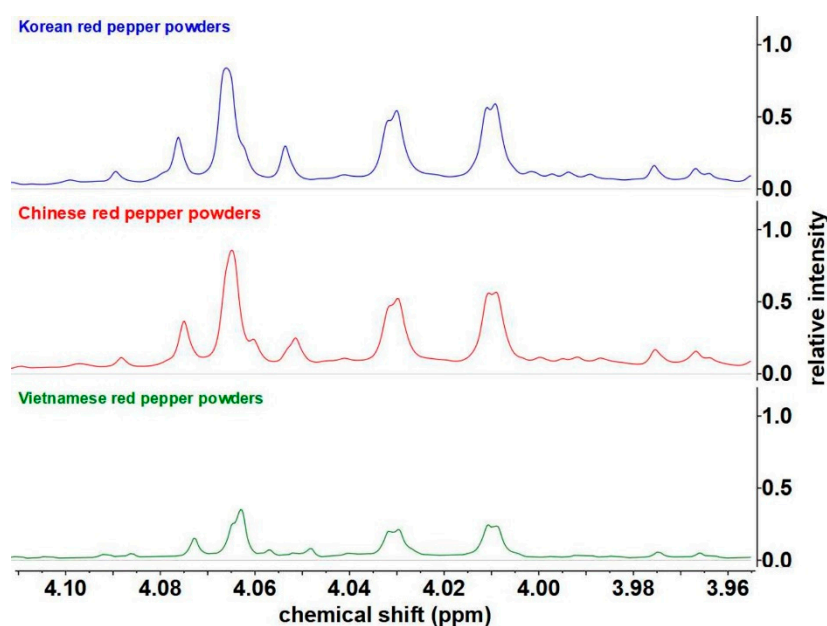

**Figure S1:** Expanded (fructose hydrogen regions, normalized to the integral sum of all signals) <sup>1</sup>H NMR spectra of Asian red pepper powders at 600MHz NMR. [1,2]

**Table S1:** Test of homogeneity of variance between the groups of Korean, Chinese, and Vietnamese red pepper powders using second derivative values of FT-IR spectra.

| Peak No. | Levene statistic | df <sub>1</sub> | df <sub>2</sub> | Significance level <sup>1</sup> |
|----------|------------------|-----------------|-----------------|---------------------------------|
| P1       | 4.320            | 2               | 83              | 0.016                           |
| P2       | 7.860            | 2               | 83              | 0.001                           |
| P3       | 11.557           | 2               | 83              | 0.000                           |
| P4       | 9.219            | 2               | 83              | 0.000                           |
| P5       | 1.167            | 2               | 83              | 0.316                           |
| P6       | 11.136           | 2               | 83              | 0.000                           |
| P7       | 0.556            | 2               | 83              | 0.576                           |
| P8       | 1.003            | 2               | 83              | 0.371                           |
| P9       | 6.640            | 2               | 83              | 0.002                           |
| P10      | 0.417            | 2               | 83              | 0.660                           |
| P11      | 4.830            | 2               | 83              | 0.010                           |
| P12      | 1.287            | 2               | 83              | 0.281                           |
| P13      | 6.084            | 2               | 83              | 0.003                           |
| P14      | 1.011            | 2               | 83              | 0.368                           |
| P15      | 5.750            | 2               | 83              | 0.005                           |
| P16      | 1.630            | 2               | 83              | 0.202                           |
| P17      | 0.441            | 2               | 83              | 0.645                           |
| P18      | 8.456            | 2               | 83              | 0.000                           |

<sup>1</sup> All results based on mean.**Table S2.** Pearson's Correlation Matrix

| Pearson Correlation | P17    | P16     | P14     | P12     | P10     | P8      | P7      | P5      |
|---------------------|--------|---------|---------|---------|---------|---------|---------|---------|
| P17                 | 1      | 0.182   | 0.069   | 0.111   | 0.242*  | 0.155   | 0.051   | 0.051   |
| P16                 | 0.182  | 1       | 0.911** | 0.801** | 0.764** | 0.782** | 0.361** | 0.794** |
| P14                 | 0.069  | 0.911** | 1       | 0.935** | 0.841** | 0.898** | 0.531** | 0.886** |
| P12                 | 0.111  | 0.801** | 0.935** | 1       | 0.888** | 0.957** | 0.595** | 0.916** |
| P10                 | 0.242* | 0.764** | 0.841** | 0.888** | 1       | 0.954** | 0.683** | 0.792** |
| P8                  | 0.155  | 0.782** | 0.898** | 0.957** | 0.954** | 1       | 0.726** | 0.847** |
| P7                  | 0.051  | 0.361** | 0.531** | 0.595** | 0.683** | 0.726** | 1       | 0.420** |
| P5                  | 0.051  | 0.794** | 0.886** | 0.916** | 0.792** | 0.847** | 0.420** | 1       |

\*. Correlation is significant at the 0.05 level (2-tailed).

\*\*. Correlation is significant at the 0.01 level (2-tailed).

## References

1. Villa-Ruano, N.; Ramirez-Meraz, M.; Mendez-Aguilar, R.; Zepeda-Vallejo, L.G.; Alvarez-Bravo, A.; Perez-Hernandez, N.; Becerra-Martinez, E. <sup>1</sup>H NMR-based metabolomics profiling of ten new races from *Capsicum annuum* cv. serrano produced in Mexico. *Food Res Int* **2019**, *119*, 785–792, doi:10.1016/j.foodres.2018.10.061.
2. Lee, D.; Kim, M.; Kim, B.H.; Ahn, S. Identification of the Geographical Origin of Asian Red Pepper (*Capsicum annuum* L.) Powders Using <sup>1</sup>H NMR Spectroscopy. *Bulletin of the Korean Chemical Society* **2020**, *41*, 317–322, doi:10.1002/bkcs.11974.
